# Supplementary material for: Model-Free Approach for the Configurational Analysis of Marine Natural Products
Source: MDPI journal article supplement (doi:10.3390/md19060283), 2021-05-21
Supplement: s1 [file s1]

## Supporting Information for

### Model-free Approach for the Configurational Analysis of Marine Natural Products

Matthias Köck<sup>a</sup>, Michael Reggelin<sup>b</sup>, and Stefan Immel<sup>b</sup>

<sup>a</sup> Alfred-Wegener-Institut für Polar- und Meeresforschung in der Helmholtz-Gemeinschaft,  
Am Handelshafen 12, 27570 Bremerhaven, Germany

<sup>b</sup> Clemens-Schöpf-Institut für Organische Chemie und Biochemie, Technische Universität Darmstadt, Alarich-Weiss-  
Straße 4, 64287 Darmstadt, Germany

#### Table of Contents

|                                                           |   |
|-----------------------------------------------------------|---|
| Formulas and Atom Numbering of Compounds 1a-c, 2 and 3    | 1 |
| NOE and Structure Data for Palau'amine Derivatives (1a-c) | 2 |
| NOE and Structure Data for Plakilactone H (2)             | 3 |
| NOE and Structure Data for Manzamine A (3)                | 4 |
| Atomic Coordinates for Compounds 1a-c, 2 and 3            | 5 |

#### Formulas and Atom Numbering of Compounds 1a-c, 2 and 3

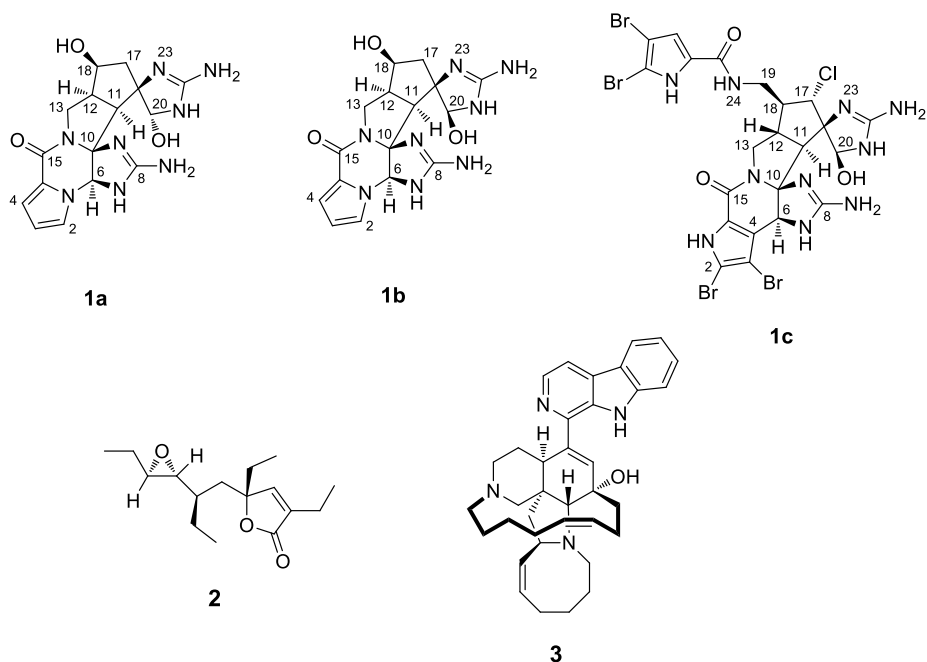

## NOE and Structure Data for Palau'amine Derivatives (1a-c)

The following Tables S1a-c and Figure S1 show the experimental and back-calculated NOE data used for the configurational analysis of the palau'amine derivatives **1a-c**. The Tables were generated directly from the output files for the *ConArch*<sup>+</sup>/*DG* best-fit (minimum pseudo energy) structure obtained from configurational and conformational analysis.

Table S1a. NOE data used for **1a**. The experimental data is listed as  $d_{mean}$ , and the allowed lower and upper bonds – here  $d_{mean} \pm 10\%$  – are labeled as  $d_{lower} \cdots d_{upper}$ ; the averaged distances back-calculated from *ConArch*<sup>+</sup>/*DG* best-fit (minimum pseudo energy) structure data are labelled  $d_{averaged}$ , and the corresponding residuals are listed only if this value falls out of range, i.e.  $d_{averaged} < d_{lower}$  or  $d_{averaged} > d_{upper}$ ; all distance are given in [Å].

|            | D(averaged) | Deviation | (Percent) | D(lower) | D(mean) | D(upper) | (+/-Range) | Weights  | NOE  | Contact |
|------------|-------------|-----------|-----------|----------|---------|----------|------------|----------|------|---------|
| NOE [01] = | 2.723941    | -         | ( - )     | 2.36700  | 2.63000 | 2.89300  | ( 10.0%)   | 1.000000 | H5   | H6      |
| NOE [02] = | 2.616689    | -         | ( - )     | 2.16900  | 2.41000 | 2.65100  | ( 10.0%)   | 1.000000 | H6   | H11     |
| NOE [03] = | 2.246777    | -         | ( - )     | 1.98900  | 2.21000 | 2.43100  | ( 10.0%)   | 1.000000 | H11  | H12     |
| NOE [04] = | 3.203849    | -         | ( - )     | 3.01500  | 3.35000 | 3.68500  | ( 10.0%)   | 1.000000 | H11  | H13B    |
| NOE [05] = | 3.357410    | -         | ( - )     | 2.76300  | 3.07000 | 3.37700  | ( 10.0%)   | 1.000000 | H11  | H17B    |
| NOE [06] = | 3.011915    | 0.041915  | 11.6%     | 2.43000  | 2.70000 | 2.97000  | ( 10.0%)   | 1.000000 | H11  | H20     |
| NOE [07] = | 2.908557    | -         | ( - )     | 2.57400  | 2.86000 | 3.14600  | ( 10.0%)   | 1.000000 | H12  | H13A    |
| NOE [08] = | 2.297098    | -         | ( - )     | 2.03400  | 2.26000 | 2.48600  | ( 10.0%)   | 1.000000 | H12  | H13B    |
| NOE [09] = | 2.506087    | -         | ( - )     | 2.50200  | 2.78000 | 3.05800  | ( 10.0%)   | 1.000000 | H12  | H17B    |
| NOE [10] = | 2.310568    | -         | ( - )     | 2.24100  | 2.49000 | 2.73900  | ( 10.0%)   | 1.000000 | H12  | H18     |
| NOE [11] = | 1.766449    | -         | ( - )     | 1.60200  | 1.78000 | 1.95800  | ( 10.0%)   | 1.000000 | H13A | H13B    |
| NOE [12] = | 3.177942    | -         | ( - )     | 2.81700  | 3.13000 | 3.44300  | ( 10.0%)   | 1.000000 | H13A | H18     |
| NOE [13] = | 1.794118    | -         | ( - )     | 1.60200  | 1.78000 | 1.95800  | ( 10.0%)   | 1.000000 | H17A | H17B    |
| NOE [14] = | 2.694828    | -         | ( - )     | 2.34900  | 2.61000 | 2.87100  | ( 10.0%)   | 1.000000 | H17A | H18     |
| NOE [15] = | 2.477978    | -         | ( - )     | 2.15100  | 2.39000 | 2.62900  | ( 10.0%)   | 1.000000 | H17B | H18     |
| NOE [16] = | 2.206491    | -0.007509 | ( -10.3%) | 2.21400  | 2.46000 | 2.70600  | ( 10.0%)   | 1.000000 | H17B | H20     |

Table S1b. NOE data used for **1b**. The experimental data is listed as  $d_{mean}$ , and the allowed lower and upper bonds – here  $d_{mean} \pm 10\%$  – are labeled as  $d_{lower} \cdots d_{upper}$ ; the averaged distances back-calculated from *ConArch*<sup>+</sup>/*DG* best-fit (minimum pseudo energy) structure data are labelled  $d_{averaged}$ , and the corresponding residuals are listed only if this value falls out of range, i.e.  $d_{averaged} < d_{lower}$  or  $d_{averaged} > d_{upper}$ ; all distance are given in [Å].

|            | D(averaged) | Deviation | (Percent) | D(lower) | D(mean) | D(upper) | (+/-Range) | Weights  | NOE  | Contact |
|------------|-------------|-----------|-----------|----------|---------|----------|------------|----------|------|---------|
| NOE [01] = | 2.685759    | -         | ( - )     | 2.35800  | 2.62000 | 2.88200  | ( 10.0%)   | 1.000000 | H5   | H6      |
| NOE [02] = | 2.428717    | 0.008717  | ( 10.4%)  | 1.98000  | 2.20000 | 2.42000  | ( 10.0%)   | 1.000000 | H6   | H11     |
| NOE [03] = | 2.396746    | -         | ( - )     | 2.05200  | 2.28000 | 2.50800  | ( 10.0%)   | 1.000000 | H11  | H12     |
| NOE [04] = | 2.998957    | -0.007043 | ( -10.2%) | 3.00600  | 3.34000 | 3.67400  | ( 10.0%)   | 1.000000 | H11  | H13B    |
| NOE [05] = | 3.687766    | -         | ( - )     | 3.09600  | 3.44000 | 3.78400  | ( 10.0%)   | 1.000000 | H11  | H17B    |
| NOE [06] = | 2.138654    | -         | ( - )     | 1.87200  | 2.08000 | 2.28800  | ( 10.0%)   | 1.000000 | H11  | H20     |
| NOE [07] = | 2.820761    | -         | ( - )     | 2.58300  | 2.87000 | 3.15700  | ( 10.0%)   | 1.000000 | H12  | H13A    |
| NOE [08] = | 2.358595    | -         | ( - )     | 2.02500  | 2.25000 | 2.47500  | ( 10.0%)   | 1.000000 | H12  | H13B    |
| NOE [09] = | 2.614365    | -         | ( - )     | 2.41200  | 2.68000 | 2.94800  | ( 10.0%)   | 1.000000 | H12  | H17B    |
| NOE [10] = | 2.326254    | -         | ( - )     | 2.04300  | 2.27000 | 2.49700  | ( 10.0%)   | 1.000000 | H12  | H18     |
| NOE [11] = | 3.096064    | -         | ( - )     | 2.54700  | 2.83000 | 3.11300  | ( 10.0%)   | 1.000000 | H12  | H20     |
| NOE [12] = | 1.757781    | -         | ( - )     | 1.60200  | 1.78000 | 1.95800  | ( 10.0%)   | 1.000000 | H13A | H13B    |
| NOE [13] = | 3.075460    | -         | ( - )     | 2.62800  | 2.92000 | 3.21200  | ( 10.0%)   | 1.000000 | H13A | H18     |
| NOE [14] = | 1.765112    | -         | ( - )     | 1.57500  | 1.75000 | 1.92500  | ( 10.0%)   | 1.000000 | H17A | H17B    |
| NOE [15] = | 2.740695    | -         | ( - )     | 2.40300  | 2.67000 | 2.93700  | ( 10.0%)   | 1.000000 | H17A | H18     |
| NOE [16] = | 2.410075    | -         | ( - )     | 2.07900  | 2.31000 | 2.54100  | ( 10.0%)   | 1.000000 | H17B | H18     |
| NOE [17] = | 3.214872    | 0.024872  | ( 10.9%)  | 2.61000  | 2.90000 | 3.19000  | ( 10.0%)   | 1.000000 | H17B | H20     |

Table S1c. NOE data used for **1c**. The experimental data is listed as  $d_{mean}$ , and the allowed lower and upper bonds – here  $d_{mean} \pm 10\%$  – are labeled as  $d_{lower} \cdots d_{upper}$ ; the averaged distances back-calculated from *ConArch*<sup>+</sup>/*DG* best-fit (minimum pseudo energy) structure data are labelled  $d_{averaged}$ , and the corresponding residuals are listed only if this value falls out of range, i.e.  $d_{averaged} < d_{lower}$  or  $d_{averaged} > d_{upper}$ ; all distance are given in [Å].

|            | D(averaged) | Deviation | (Percent) | D(lower) | D(mean) | D(upper) | (+/-Range) | Weights  | NOE  | Contact |
|------------|-------------|-----------|-----------|----------|---------|----------|------------|----------|------|---------|
| NOE [01] = | 2.431126    | 0.011126  | ( 10.5%)  | 1.98000  | 2.20000 | 2.42000  | ( 10.0%)   | 1.000000 | H6   | H11     |
| NOE [02] = | 2.745016    | -         | ( - )     | 2.25000  | 2.50000 | 2.75000  | ( 10.0%)   | 1.000000 | H11  | H13B    |
| NOE [03] = | 3.618106    | 0.021106  | ( 10.6%)  | 2.94300  | 3.27000 | 3.59700  | ( 10.0%)   | 1.000000 | H11  | H17A    |
| NOE [04] = | 2.293836    | -         | ( - )     | 2.09700  | 2.33000 | 2.56300  | ( 10.0%)   | 1.000000 | H11  | H18     |
| NOE [05] = | 2.992198    | 0.011198  | ( 10.4%)  | 2.43900  | 2.71000 | 2.98100  | ( 10.0%)   | 1.000000 | H11  | H20     |
| NOE [06] = | 2.636674    | 0.007674  | ( 10.3%)  | 2.15100  | 2.39000 | 2.62900  | ( 10.0%)   | 1.000000 | H12  | H17A    |
| NOE [07] = | 2.636882    | -         | ( - )     | 2.34000  | 2.60000 | 2.86000  | ( 10.0%)   | 1.000000 | H13B | H18     |
| NOE [08] = | 3.053332    | -         | ( - )     | 2.50200  | 2.78000 | 3.05800  | ( 10.0%)   | 1.000000 | H17A | H18     |
| NOE [09] = | 3.332277    | 0.021277  | ( 10.7%)  | 2.70900  | 3.01000 | 3.31100  | ( 10.0%)   | 1.000000 | H17A | H20     |

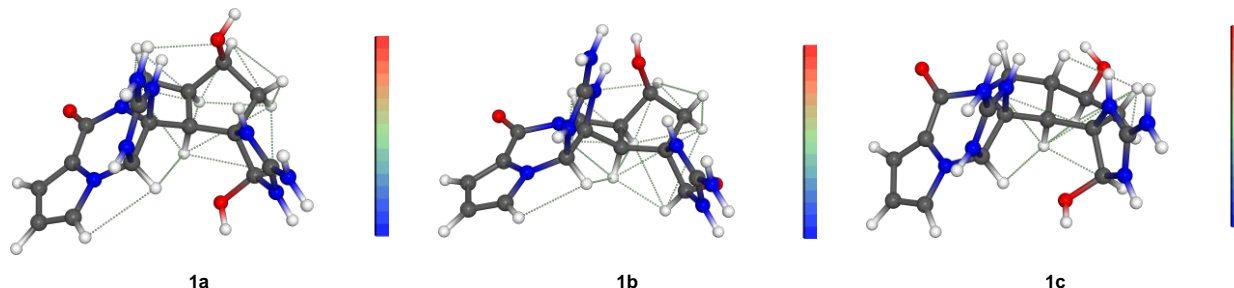

Figure S1. Plot of the best-fit (minimum pseudo energy) DG structures of the palau'amine derivatives **1a-c** with color-coded representation of all NOE contacts used in the configurational and conformational analysis. The color scale was adapted from calculated final NOE violations, ranging from -0.40 Å (blue) to +0.40 Å (red).

## NOE and Structure Data for Plakilactone H (2)

The following Table S2 and Figure S2 show the experimental and back-calculated NOE data used for the configurational analysis of the plakilactone (**2**). The Table was generated directly from the output files for the *ConArch*<sup>†</sup>/*DG* best-fit (minimum pseudo energy) structure obtained from configurational and conformational analysis.

Table S2. NOE data used for **2**. The experimental data is listed as  $d_{mean}$ , and the allowed lower and upper bonds – here  $d_{mean} \pm 10\%$  – are labeled as  $d_{lower} \cdots d_{upper}$ ; the averaged distances back-calculated from *ConArch*<sup>†</sup>/*DG* best-fit (minimum pseudo energy) structure data are labelled  $d_{averaged}$ , and the corresponding residuals are listed only if this value falls out of range, i.e.  $d_{averaged} < d_{lower}$  or  $d_{averaged} > d_{upper}$ ; all distance are given in [Å].

|            | D(averaged) | Deviation | (Percent) | D(lower) | D(mean) | D(upper) | (+/-Range) | Weights  | NOE Contact                 |
|------------|-------------|-----------|-----------|----------|---------|----------|------------|----------|-----------------------------|
| NOE [01] = | 2.644129    | -         | (-)       | 2.47500  | 2.75000 | 3.02500  | (10.0%)    | 1.000000 | H16A H16B H16C    H15B      |
| NOE [02] = | 2.913799    | -0.074201 | (-12.2%)  | 2.98800  | 3.32000 | 3.65200  | (10.0%)    | 1.000000 | H16A H16B H16C    H8        |
| NOE [03] = | 3.465938    | 0.011938  | (10.4%)   | 2.82600  | 3.14000 | 3.45400  | (10.0%)    | 1.000000 | H3    H11A H11B             |
| NOE [04] = | 2.588254    | -0.021746 | (-10.7%)  | 2.61000  | 2.90000 | 3.19000  | (10.0%)    | 1.000000 | H3    H5B                   |
| NOE [05] = | 3.209843    | 0.074843  | (12.6%)   | 2.56500  | 2.85000 | 3.13500  | (10.0%)    | 1.000000 | H3    H13A                  |
| NOE [06] = | 3.529531    | 0.009531  | (10.3%)   | 2.88000  | 3.20000 | 3.52000  | (10.0%)    | 1.000000 | H3    H12A H12B H12C        |
| NOE [07] = | 2.647202    | -0.151798 | (-14.9%)  | 2.79900  | 3.11000 | 3.42100  | (10.0%)    | 1.000000 | H3    H14A H14B H14C        |
| NOE [08] = | 3.565704    | 0.023704  | (10.7%)   | 2.89800  | 3.22000 | 3.54200  | (10.0%)    | 1.000000 | H3    H6                    |
| NOE [09] = | 2.845071    | -         | (-)       | 2.41200  | 2.68000 | 2.94800  | (10.0%)    | 1.000000 | H8    H9A H9B               |
| NOE [10] = | 2.955072    | -         | (-)       | 2.88900  | 3.21000 | 3.53100  | (10.0%)    | 1.000000 | H8    H10A H10B H10C        |
| NOE [11] = | 2.470103    | -         | (-)       | 2.08800  | 2.32000 | 2.55200  | (10.0%)    | 1.000000 | H8    H6                    |
| NOE [12] = | 2.481681    | -         | (-)       | 2.37600  | 2.64000 | 2.90400  | (10.0%)    | 1.000000 | H7    H5B                   |
| NOE [13] = | 2.649766    | -         | (-)       | 2.38500  | 2.65000 | 2.91500  | (10.0%)    | 1.000000 | H7    H9A H9B               |
| NOE [14] = | 2.441980    | -0.015020 | (-10.6%)  | 2.45700  | 2.73000 | 3.00300  | (10.0%)    | 1.000000 | H7    H15A                  |
| NOE [15] = | 3.840827    | -         | (-)       | 3.18600  | 3.54000 | 3.89400  | (10.0%)    | 1.000000 | H7    H10A H10B H10C        |
| NOE [16] = | 3.874147    | 0.090147  | (12.6%)   | 3.09600  | 3.44000 | 3.78400  | (10.0%)    | 1.000000 | H7    H16A H16B H16C        |
| NOE [17] = | 3.102404    | -         | (-)       | 2.64600  | 2.94000 | 3.23400  | (10.0%)    | 1.000000 | H7    H6                    |
| NOE [18] = | 2.352820    | -0.050180 | (-11.9%)  | 2.40300  | 2.67000 | 2.93700  | (10.0%)    | 1.000000 | H5B    H13A                 |
| NOE [19] = | 2.903985    | -0.003015 | (-10.1%)  | 2.90700  | 3.23000 | 3.55300  | (10.0%)    | 1.000000 | H5B    H6                   |
| NOE [20] = | 3.489705    | 0.145705  | (14.8%)   | 2.73600  | 3.04000 | 3.34400  | (10.0%)    | 1.000000 | H5B    H14A H14B H14C       |
| NOE [21] = | 2.676060    | -         | (-)       | 2.67300  | 2.97000 | 3.26700  | (10.0%)    | 1.000000 | H15B    H6                  |
| NOE [22] = | 3.807998    | 0.023998  | (10.7%)   | 3.09600  | 3.44000 | 3.78400  | (10.0%)    | 1.000000 | H15A    H8                  |
| NOE [23] = | 2.632971    | -         | (-)       | 2.46600  | 2.74000 | 3.01400  | (10.0%)    | 1.000000 | H9A H9B    H10A H10B H10C   |
| NOE [24] = | 2.621216    | -0.096784 | (-13.2%)  | 2.71800  | 3.02000 | 3.32200  | (10.0%)    | 1.000000 | H15A    H16A H16B H16C      |
| NOE [25] = | 2.616184    | -         | (-)       | 2.48400  | 2.76000 | 3.03600  | (10.0%)    | 1.000000 | H12A H12B H12C    H11A H11B |

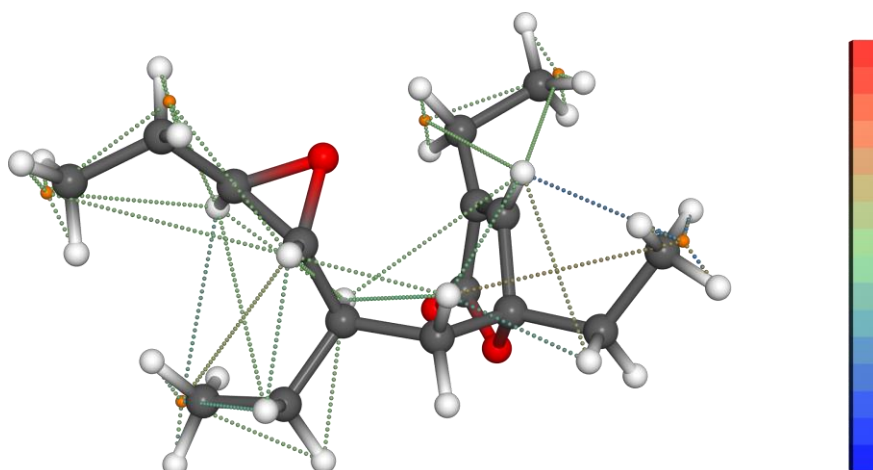

Figure S2. Plot of the best-fit (minimum pseudo energy) DG structures of plakilactone H (**2**) with color-coded representation of all NOE contacts used in the configurational and conformational analysis. The color scale was adapted from calculated final NOE violations, ranging from -0.40 Å (blue) to +0.40 Å (red).

## NOE and Structure Data for Manzamine A (3)

The following Table S3-4 and Figure S3 show the experimental and back-calculated NOE and RDC data used for the configurational analysis of the manzamine A (**3**). The Table was generated directly from the output files for the *ConArch*<sup>+</sup>/DG best-fit (minimum pseudo energy) structure obtained from configurational and conformational analysis.

Table S3. NOE data used for **3**. The experimental data is listed as  $d_{mean}$ , and the allowed lower and upper bonds – here  $d_{mean} \pm 10\%$  – are labeled as  $d_{lower} \cdots d_{upper}$ ; the averaged distances back-calculated from *ConArch*<sup>+</sup>/DG best-fit (minimum pseudo energy) structure data are labelled  $d_{averaged}$ , and the corresponding residuals are listed only if this value falls out of range, i.e.  $d_{averaged} < d_{lower}$  or  $d_{averaged} > d_{upper}$ ; all distance are given in [Å].

|           | D(averaged) | Deviation | (Percent) | D(lower) | D(mean) | D(upper) | (+/-Range) | Weights  | NOE Contact      |
|-----------|-------------|-----------|-----------|----------|---------|----------|------------|----------|------------------|
| NOE[01] = | 2.476617    | -         | ( - )     | 2.02700  | 2.25200 | 2.47700  | ( 10.0%)   | 1.000000 | H14A H14B    H26 |
| NOE[02] = | 2.797847    | -         | ( - )     | 2.61400  | 2.90400 | 3.19400  | ( 10.0%)   | 1.000000 | H17A H17B    H26 |
| NOE[03] = | 2.497658    | -         | ( - )     | 2.29800  | 2.55300 | 2.80800  | ( 10.0%)   | 1.000000 | H26    H28A H28B |
| NOE[04] = | 2.570980    | -         | ( - )     | 2.30500  | 2.56100 | 2.81700  | ( 10.0%)   | 1.000000 | H26    H36A H36B |
| NOE[05] = | 2.159208    | -         | ( - )     | 1.93200  | 2.14700 | 2.36200  | ( 10.0%)   | 1.000000 | H30A H30B    H34 |
| NOE[06] = | 2.226290    | -         | ( - )     | 1.99800  | 2.22000 | 2.44200  | ( 10.0%)   | 1.000000 | H32    H33       |
| NOE[07] = | 2.742605    | -         | ( - )     | 2.40400  | 2.67100 | 2.93800  | ( 10.0%)   | 1.000000 | H33    H35A H35B |
| NOE[08] = | 2.449948    | -         | ( - )     | 2.02600  | 2.25100 | 2.47600  | ( 10.0%)   | 1.000000 | H33    H36A H36B |
| NOE[09] = | 2.558147    | -         | ( - )     | 2.28000  | 2.53300 | 2.78600  | ( 10.0%)   | 1.000000 | H34    H35A H35B |

Table S4. RDC data used for **3**. The experimental data is listed as  $D_{exp}$ , and the RDCs back-calculated from the structure model are labeled  $D_{calc}$ . All values including the Monte-Carlo derived error estimates are given in [Hz].

| Results for Multi-Parameter SVD Fit of Calculated and Experimental Data: |            |             |            |              | D(exp)-D(calc) |           | Normalized Weights |          | Atom Labels       |  |
|--------------------------------------------------------------------------|------------|-------------|------------|--------------|----------------|-----------|--------------------|----------|-------------------|--|
| D(calC) [Hz]                                                             | +/- Error  | D(exp) [Hz] | +/- Error  | Rel. Weights | r[01]          | w[01]     | w[01]              |          |                   |  |
| D[01] =                                                                  | 21.704870  | 21.823309   | 0.500000   | 1.000000     | r[01] =        | 0.118439  | w[01] =            | 0.035714 | C3-H3             |  |
| D[02] =                                                                  | 0.137062   | 1.671443    | 0.091663   | 0.500000     | r[02] =        | -0.045399 | w[02] =            | 0.035714 | C4-H4             |  |
| D[03] =                                                                  | 21.655839  | 0.096703    | 21.786998  | 0.500000     | r[03] =        | 0.131160  | w[03] =            | 0.035714 | C5-H5             |  |
| D[04] =                                                                  | -26.334976 | 1.461292    | -26.566153 | 0.500000     | r[04] =        | -0.231177 | w[04] =            | 0.035714 | C6-H6             |  |
| D[05] =                                                                  | -6.583622  | 1.763345    | -6.649118  | 0.500000     | r[05] =        | -0.065496 | w[05] =            | 0.035714 | C7-H7             |  |
| D[06] =                                                                  | 22.529338  | 1.052731    | 22.695334  | 0.500000     | r[06] =        | 0.165996  | w[06] =            | 0.035714 | C8-H8             |  |
| D[07] =                                                                  | 1.945254   | 1.370447    | 1.886530   | 0.500000     | r[07] =        | -0.058724 | w[07] =            | 0.035714 | C11-H11           |  |
| D[08] =                                                                  | 22.670474  | 1.481094    | 22.847812  | 0.500000     | r[08] =        | 0.177337  | w[08] =            | 0.035714 | C13-H13A+C13-H13B |  |
| D[09] =                                                                  | 23.926041  | 1.398360    | 24.107193  | 0.500000     | r[09] =        | 0.181152  | w[09] =            | 0.035714 | C14-H14A+C14-H14B |  |
| D[10] =                                                                  | 9.241049   | 1.107958    | 9.331405   | 0.500000     | r[10] =        | 0.090356  | w[10] =            | 0.035714 | C15-H15           |  |
| D[11] =                                                                  | -27.621917 | 1.440511    | -27.669637 | 0.500000     | r[11] =        | -0.047719 | w[11] =            | 0.035714 | C16-H16           |  |
| D[12] =                                                                  | -39.585065 | 1.967031    | -39.747489 | 0.500000     | r[12] =        | -0.162423 | w[12] =            | 0.035714 | C17-H17A+C17-H17B |  |
| D[13] =                                                                  | -40.930775 | 1.964931    | -41.123129 | 0.500000     | r[13] =        | -0.192354 | w[13] =            | 0.035714 | C18-H18A+C18-H18B |  |
| D[14] =                                                                  | 12.472912  | 1.653159    | 12.535599  | 0.500000     | r[14] =        | 0.062687  | w[14] =            | 0.035714 | C19-H19A+C19-H19B |  |
| D[15] =                                                                  | 40.418646  | 1.296505    | 40.598288  | 0.500000     | r[15] =        | 0.179643  | w[15] =            | 0.035714 | C20-H20A+C20-H20B |  |
| D[16] =                                                                  | -9.743054  | 1.726061    | -9.846516  | 0.500000     | r[16] =        | -0.103462 | w[16] =            | 0.035714 | C22-H22A+C22-H22B |  |
| D[17] =                                                                  | 27.387241  | 1.667193    | 27.491775  | 0.500000     | r[17] =        | 0.104534  | w[17] =            | 0.035714 | C23-H23A+C23-H23B |  |
| D[18] =                                                                  | 8.335456   | 1.500358    | 8.231811   | 0.500000     | r[18] =        | -0.103645 | w[18] =            | 0.035714 | C24-H24           |  |
| D[19] =                                                                  | -30.251677 | 1.408419    | -30.525030 | 0.500000     | r[19] =        | -0.273353 | w[19] =            | 0.035714 | C26-H26           |  |
| D[20] =                                                                  | -6.911463  | 1.824540    | -6.919452  | 0.500000     | r[20] =        | -0.007989 | w[20] =            | 0.035714 | C28-H28A+C28-H28B |  |
| D[21] =                                                                  | 5.251709   | 1.918694    | 5.197804   | 0.500000     | r[21] =        | -0.053905 | w[21] =            | 0.035714 | C29-H29A+C29-H29B |  |
| D[22] =                                                                  | 9.627178   | 2.190704    | 9.674817   | 0.500000     | r[22] =        | 0.047639  | w[22] =            | 0.035714 | C30-H30A+C30-H30B |  |
| D[23] =                                                                  | -22.660937 | 2.127970    | -22.765273 | 0.500000     | r[23] =        | -0.104337 | w[23] =            | 0.035714 | C31-H31A+C31-H31B |  |
| D[24] =                                                                  | 2.729423   | 1.233013    | 2.762687   | 0.500000     | r[24] =        | 0.033264  | w[24] =            | 0.035714 | C32-H32           |  |
| D[25] =                                                                  | 8.710639   | 1.522551    | 8.639642   | 0.500000     | r[25] =        | -0.070997 | w[25] =            | 0.035714 | C33-H33           |  |
| D[26] =                                                                  | -28.729280 | 1.548104    | -28.870231 | 0.500000     | r[26] =        | -0.140951 | w[26] =            | 0.035714 | C34-H34           |  |
| D[27] =                                                                  | 4.847359   | 1.544533    | 4.742710   | 0.500000     | r[27] =        | -0.104650 | w[27] =            | 0.035714 | C35-H35A+C35-H35B |  |
| D[28] =                                                                  | 33.787954  | 1.525093    | 33.909669  | 0.500000     | r[28] =        | 0.121715  | w[28] =            | 0.035714 | C36-H36A+C36-H36B |  |

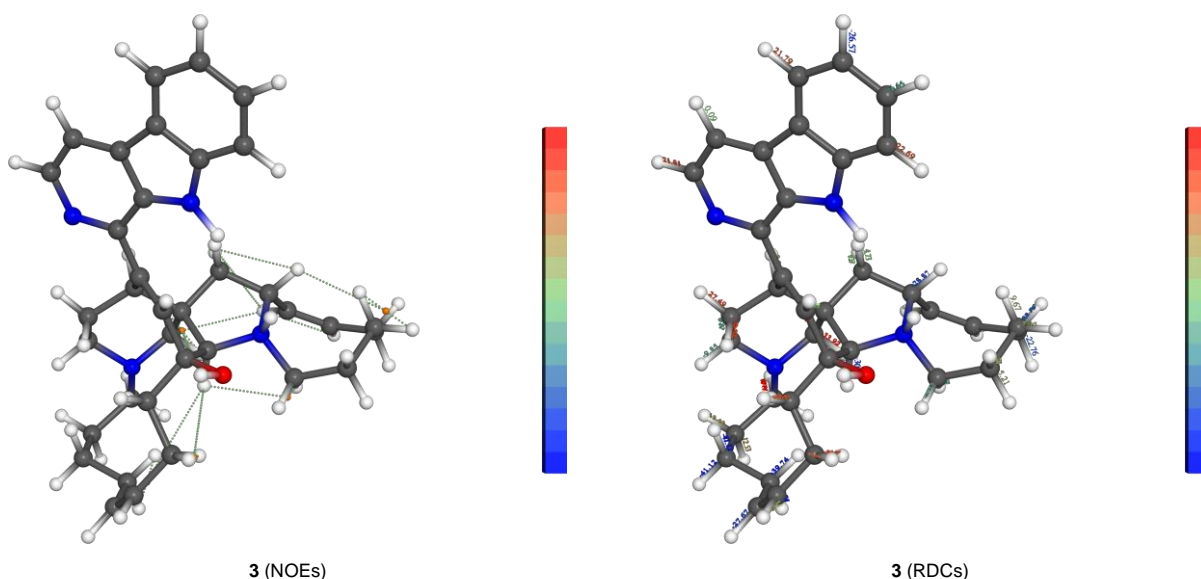

Figure S3. Plot of the best-fit (minimum pseudo energy) DG structures of manzamine A (**3**) with color-coded representation of all NOE contacts (left model) and all RDCs (right model) used in the configurational and conformational analysis. The color scale was adapted from calculated final NOE violations, ranging from -0.40 Å (blue) to +0.40 Å (red), or to the range of RDCs (blue: -40 Hz, red: +40 Hz) back-calculated for **3**.

# Atomic Coordinates for Compounds 1a-c, 2 and 3

The following tables provide the atomic coordinates for the final best-fit (minimum pseudo energy) DG structures of **1a-c**, **2**, and **3**, copy-and-paste for further usage:

Table S5. rDG best-fit structures (atomic coordinates) for compounds **1a-c**, **2**, and **3**.

| Palau'amine Derivatives                                                           |           |           |           | Plakilactone H                                                                    |           |           |           | Manzamine A                                                                         |           |           |           |                                                                                     |           |           |           |
|-----------------------------------------------------------------------------------|-----------|-----------|-----------|-----------------------------------------------------------------------------------|-----------|-----------|-----------|-------------------------------------------------------------------------------------|-----------|-----------|-----------|-------------------------------------------------------------------------------------|-----------|-----------|-----------|
| 1a                                                                                |           | 1b        |           | 1c                                                                                |           | 2         |           | 3                                                                                   |           |           |           |                                                                                     |           |           |           |
| 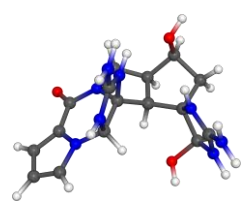 |           |           |           |  |           |           |           |  |           |           |           |  |           |           |           |
| N1                                                                                | -0.933681 | 2.737943  | -0.294880 | N1                                                                                | 2.091626  | -2.095249 | -0.009804 | C1                                                                                  | 1.424495  | 0.714735  | 2.153258  | N1                                                                                  | -2.335033 | 2.062666  | -1.148102 |
| C2                                                                                | -2.327504 | 2.652587  | -0.295406 | C2                                                                                | 1.399632  | -3.308700 | 0.053678  | C2                                                                                  | 2.078856  | 0.667628  | 0.775509  | N2                                                                                  | -3.505054 | 1.693042  | -1.749376 |
| C3                                                                                | -2.840589 | 3.937060  | -0.124828 | C3                                                                                | 2.778764  | -4.338880 | -0.292816 | C3                                                                                  | 1.378837  | 1.423829  | -0.027627 | C3                                                                                  | -4.269538 | 2.635855  | -2.403261 |
| C4                                                                                | -1.726753 | 4.828516  | -0.017523 | C4                                                                                | 3.544757  | -3.722375 | -0.575477 | C4                                                                                  | 0.176689  | 2.065965  | 0.738694  | C4                                                                                  | -3.904867 | 3.968770  | -2.486401 |
| C5                                                                                | -0.567493 | 4.077710  | -0.123622 | C5                                                                                | 3.414441  | -2.556007 | -0.397425 | C5                                                                                  | -1.147993 | 1.410698  | 0.208329  | C4A                                                                                 | -2.721391 | 4.379448  | -1.882836 |
| C6                                                                                | -0.050870 | 1.651889  | -0.442465 | C6                                                                                | 1.574447  | -0.811682 | 0.268337  | C6                                                                                  | -1.265218 | -0.124005 | 0.388406  | C6                                                                                  | -2.023889 | 5.851489  | -1.745799 |
| N7                                                                                | 0.789313  | 1.733518  | -1.693290 | N7                                                                                | 2.057408  | -0.214513 | 1.538476  | N7                                                                                  | -1.227633 | -0.790652 | -0.015873 | C5                                                                                  | -2.300546 | 6.945055  | -2.250084 |
| C8                                                                                | 0.686092  | 0.616321  | -2.439749 | C8                                                                                | 1.056191  | 0.123108  | 2.377653  | C8                                                                                  | -0.656363 | -2.191297 | -1.167335 | C6                                                                                  | -1.379288 | 7.964439  | -1.968870 |
| N9                                                                                | 1.321802  | 0.432268  | -3.605882 | N9                                                                                | 1.245803  | 0.674015  | 3.584357  | C9                                                                                  | -1.113856 | -3.094760 | -2.327058 | C7                                                                                  | -0.199727 | 7.703196  | -1.235139 |
| N9                                                                                | -0.133854 | -0.278709 | -1.857730 | N9                                                                                | -0.140149 | -0.170085 | 1.832234  | C10                                                                                 | -2.081511 | -4.201027 | -1.831142 | C10                                                                                 | 0.090763  | 6.414201  | -0.757099 |
| C10                                                                               | -0.698665 | 0.231364  | -0.543149 | C10                                                                               | -0.020141 | -0.778115 | 0.457233  | C11                                                                                 | 3.327075  | -0.162759 | 0.564266  | C8A                                                                                 | -0.833485 | 5.393043  | -1.036008 |
| C11                                                                               | -0.518545 | -0.776397 | 0.624302  | C11                                                                               | -0.843589 | -0.004942 | -0.624244 | C11                                                                                 | 4.592323  | 0.715242  | 0.325659  | C9A                                                                                 | -1.908867 | 3.415106  | -1.198194 |
| C12                                                                               | -1.612086 | -1.784176 | 0.465759  | C12                                                                               | -2.736409 | -0.500565 | -0.505346 | C13                                                                                 | 0.158303  | 3.975032  | 0.495002  | N9                                                                                  | -0.782775 | 4.077496  | -0.693799 |
| C13                                                                               | -2.736412 | -1.118413 | -0.297383 | C13                                                                               | -2.061338 | -0.032744 | -0.157276 | C14                                                                                 | 1.122855  | 4.169717  | -0.601417 | C10                                                                                 | -1.533443 | 1.001759  | -0.466170 |
| N14                                                                               | -2.164012 | 0.232020  | -0.625665 | N14                                                                               | -0.669448 | -2.070468 | 0.406129  | C15                                                                                 | -2.632986 | -0.537826 | 1.081117  | C11                                                                                 | -0.962786 | 1.214081  | 0.727282  |
| C15                                                                               | -1.011129 | 1.367291  | -0.457015 | C15                                                                               | -0.015474 | -3.350665 | 0.434225  | C16                                                                                 | -2.681570 | -1.948428 | 1.641498  | C12                                                                                 | -0.137747 | 0.181219  | 1.490806  |
| O15                                                                               | -4.226925 | 1.218094  | -0.454890 | O15                                                                               | -0.639248 | -4.336910 | 0.753742  | O1                                                                                  | 0.443413  | 1.734190  | 2.076345  | O12                                                                                 | 0.703996  | 0.876225  | 2.428788  |
| C16                                                                               | 0.777670  | -1.498804 | 1.095579  | C16                                                                               | -0.995040 | -3.531685 | -0.821584 | O2                                                                                  | 1.642172  | 0.078907  | 3.125915  | C13                                                                                 | -1.021769 | -0.763674 | 2.348864  |
| C17                                                                               | 0.308559  | -1.048964 | 1.092420  | C17                                                                               | -2.476491 | 1.808959  | -2.759505 | O3                                                                                  | 0.093860  | -1.012653 | -1.544005 | C14                                                                                 | -2.044057 | -1.398398 | 3.571198  |
| C18                                                                               | -0.892333 | -1.107023 | 0.063254  | C18                                                                               | -2.972564 | 0.485762  | 0.396232  | H3                                                                                  | 1.411739  | 1.742716  | -1.069418 | C15                                                                                 | -1.084943 | -4.138699 | 4.308500  |
| O19                                                                               | -0.330984 | -1.093736 | -1.235419 | O19                                                                               | -2.490905 | 0.488727  | 1.744935  | H5A                                                                                 | -1.998891 | 1.946106  | 0.629529  | C16                                                                                 | -1.368048 | -3.675052 | 3.915640  |
| C20                                                                               | 1.270668  | -1.097048 | 2.537806  | C20                                                                               | -0.868580 | -2.025538 | -2.316638 | H5B                                                                                 | -1.165239 | 1.620959  | -0.861064 | C17                                                                                 | -0.863070 | -4.328092 | 2.626184  |
| O20                                                                               | 0.614343  | 0.165685  | 2.918561  | O20                                                                               | -2.112162 | 2.650406  | -2.743613 | H6                                                                                  | -0.447534 | 0.525177  | 0.598885  | C18                                                                                 | -2.057721 | -4.667602 | 1.721332  |
| N21                                                                               | 2.690393  | -0.870742 | 2.350390  | N21                                                                               | 0.201078  | 3.010494  | -2.262097 | H7                                                                                  | -2.033227 | -0.544407 | -1.707596 | C19                                                                                 | -1.664145 | -5.361467 | 0.391145  |
| C22                                                                               | 0.068106  | -1.004145 | 1.052250  | C22                                                                               | 0.656161  | -2.053568 | -0.999688 | H8                                                                                  | -0.399640 | -2.688698 | -0.230335 | C20                                                                                 | -0.640583 | -4.599258 | -0.463872 |
| N22                                                                               | 4.320063  | -0.818670 | 0.617529  | N22                                                                               | 1.624155  | 4.074233  | -0.680134 | H9B                                                                                 | -0.228583 | -3.539513 | -2.781577 | N21                                                                                 | -0.914430 | -3.138805 | -0.505470 |
| N23                                                                               | -2.014157 | -1.342081 | 0.296894  | N23                                                                               | 0.001144  | -2.411396 | -0.142307 | H9A                                                                                 | -1.606233 | -2.463607 | -3.068490 | C22                                                                                 | -2.54331  | -2.783186 | -1.018615 |
| H3                                                                                | -3.901094 | 4.185663  | -0.084505 | H3                                                                                | 0.025195  | -5.388257 | -0.334347 | H10A                                                                                | -2.752945 | -3.815329 | -1.063996 | C23                                                                                 | -2.531413 | -1.298050 | -0.708421 |
| H4                                                                                | -1.771515 | 5.908476  | 0.123135  | H4                                                                                | 4.656224  | -4.237225 | -0.879216 | H10B                                                                                | -2.687644 | -4.576428 | -2.565629 | C24                                                                                 | -1.386995 | -0.347379 | -1.171461 |
| H5                                                                                | 0.480699  | 4.375113  | -0.092890 | H5                                                                                | 4.133252  | -1.546879 | -0.511653 | H10C                                                                                | -1.532335 | -5.040990 | -1.405740 | C25                                                                                 | 0.067955  | -0.903044 | -0.953107 |
| H6                                                                                | 0.679798  | 1.700390  | 0.382579  | H6                                                                                | 1.830139  | -0.166320 | -0.566676 | H11A                                                                                | 3.176275  | -0.801371 | -0.360698 | C26                                                                                 | 0.704343  | -0.685285 | 0.477796  |
| H7                                                                                | 1.332303  | 2.536880  | -1.938675 | H7                                                                                | 3.040856  | -0.085725 | 1.748604  | H11B                                                                                | 3.479779  | -0.806265 | 1.430684  | N27                                                                                 | 2.079413  | -0.021302 | 0.238216  |
| H8                                                                                | -0.354584 | -1.137093 | -2.210907 | H8                                                                                | -0.989514 | -0.006841 | -2.257314 | H12A                                                                                | 4.349198  | 1.585637  | -0.283769 | C28                                                                                 | 3.115774  | -0.561438 | 1.191375  |
| H11                                                                               | -0.770016 | -0.171585 | 1.405824  | H11                                                                               | -0.382005 | -0.348424 | -1.554953 | H12B                                                                                | 5.002486  | 1.059751  | 1.274927  | C29                                                                                 | 4.370215  | -0.335426 | 1.345501  |
| H12                                                                               | -2.003670 | -2.049165 | 1.447870  | H12                                                                               | -2.772041 | -0.481047 | -1.451320 | H12C                                                                                | 5.358387  | 0.136782  | 0.190703  | C30                                                                                 | 5.599554  | 0.577838  | 0.027625  |
| H18                                                                               | -1.533084 | -3.968626 | 0.250814  | H18                                                                               | -4.051002 | 0.359608  | 0.300540  | H13A                                                                                | -0.818118 | 3.762190  | 0.048457  | C31                                                                                 | 5.067876  | -0.590403 | -0.770412 |
| H19                                                                               | -0.207042 | -3.997763 | -1.581631 | H19                                                                               | -3.773740 | 0.253002  | 2.531779  | H13B                                                                                | 0.277368  | 4.130857  | 1.425267  | C32                                                                                 | 4.838083  | -1.452247 | -1.455369 |
| H20                                                                               | 0.987717  | -1.815280 | 3.307339  | H20                                                                               | -0.692370 | 1.202390  | -3.009081 | H14A                                                                                | 2.203332  | 4.235340  | -0.473495 | C33                                                                                 | 3.276212  | -1.277027 | -1.698027 |
| H20K                                                                              | 1.319692  | 0.768939  | 3.216070  | H20K                                                                              | -2.712366 | 1.943920  | -3.049317 | H14B                                                                                | 0.657511  | 3.945617  | -1.568099 | C34                                                                                 | 2.405076  | -0.091476 | -1.283770 |
| H21                                                                               | 3.334601  | -0.589670 | 3.077442  | H21                                                                               | 0.549019  | 3.527944  | -3.057124 | H14C                                                                                | 0.770014  | 5.201028  | -0.601228 | C35                                                                                 | 1.015762  | -0.094742 | -1.895267 |
| H23                                                                               | 2.071005  | -1.521495 | -0.684135 | H23                                                                               | 0.192817  | 2.376127  | 0.837675  | H15B                                                                                | -2.857561 | 0.214199  | 1.856878  | C36                                                                                 | 0.100254  | -2.141372 | -1.284036 |
| H24                                                                               | 1.930731  | 1.154593  | 3.937447  | H24                                                                               | 2.182720  | 0.870187  | 3.936546  | H15A                                                                                | -3.397820 | 4.050063  | 0.285574  | H3                                                                                  | -0.205529 | 2.305546  | -2.885574 |
| H8B                                                                               | 1.215913  | -0.423623 | -4.138617 | H8B                                                                               | 0.462819  | 0.913316  | 4.185017  | H16A                                                                                | -3.504392 | -2.083625 | 2.343485  | H4                                                                                  | -4.561417 | 4.645963  | -0.032709 |
| H13A                                                                              | -1.028787 | -1.590808 | -1.231178 | H13A                                                                              | -2.738404 | -2.404187 | 0.611932  | H16B                                                                                | -2.831144 | -2.687012 | 0.831447  | H5                                                                                  | -3.199049 | 7.161556  | -2.827942 |
| H13B                                                                              | -3.638027 | -0.929405 | 0.285255  | H13B                                                                              | -2.132644 | -2.708002 | -1.009944 | H16C                                                                                | -1.782441 | -2.197742 | 2.204977  | H6                                                                                  | -1.578409 | 8.968184  | -2.344228 |
| H17A                                                                              | 1.108561  | -1.672912 | 0.659941  | H17A                                                                              | -2.501009 | 2.614405  | 0.458094  |                                                                                     |           |           |           | H7                                                                                  | 0.489707  | 8.528372  | -1.056628 |
| H17B                                                                              | 0.020103  | -3.380568 | 0.298883  | H17B                                                                              | -3.127523 | 2.085798  | -1.105132 |                                                                                     |           |           |           | H8                                                                                  | 1.011548  | 6.232973  | -0.202652 |
| H22A                                                                              | 5.070192  | -0.561122 | 2.28067   | H22A                                                                              | 2.077139  | 4.646041  | -1.391451 |                                                                                     |           |           |           | H9                                                                                  | 0.034589  | 3.547823  | -1.082828 |
| H22B                                                                              | 4.565686  | -0.927383 | -0.364095 | H22B                                                                              | 1.938862  | 4.192162  | 0.280521  |                                                                                     |           |           |           | H11                                                                                 | -0.994913 | 2.184836  | 1.206727  |
|                                                                                   |           |           |           |                                                                                   |           |           |           |                                                                                     |           |           |           | H12                                                                                 | -0.034294 | 1.384420  | 2.893263  |
|                                                                                   |           |           |           |                                                                                   |           |           |           |                                                                                     |           |           |           | H13A                                                                                | -1.384556 | -1.582479 | 1.727440  |
|                                                                                   |           |           |           |                                                                                   |           |           |           |                                                                                     |           |           |           | H13B                                                                                | -1.864285 | -0.205091 | 2.756605  |
|                                                                                   |           |           |           |                                                                                   |           |           |           |                                                                                     |           |           |           | H14A                                                                                | 0.646918  | -1.888447 | 3.178621  |
|                                                                                   |           |           |           |                                                                                   |           |           |           |                                                                                     |           |           |           | H14B                                                                                | 0.028597  | -0.577670 | 4.234647  |
|                                                                                   |           |           |           |                                                                                   |           |           |           |                                                                                     |           |           |           | H15                                                                                 | -1.537874 | -2.101541 | 5.249140  |
|                                                                                   |           |           |           |                                                                                   |           |           |           |                                                                                     |           |           |           | H16                                                                                 | -2.010108 | -4.232782 | 4.597399  |
|                                                                                   |           |           |           |                                                                                   |           |           |           |                                                                                     |           |           |           | H17A                                                                                | -0.188250 | -3.665756 | 2.083941  |
|                                                                                   |           |           |           |                                                                                   |           |           |           |                                                                                     |           |           |           | H17B                                                                                | -0.344933 | -5.257323 | 2.862978  |
|                                                                                   |           |           |           |                                                                                   |           |           |           |                                                                                     |           |           |           | H18A                                                                                | -2.715092 | -5.369475 | 2.233919  |
|                                                                                   |           |           |           |                                                                                   |           |           |           |                                                                                     |           |           |           | H18B                                                                                | -2.574341 | -3.746202 | 1.453448  |
|                                                                                   |           |           |           |                                                                                   |           |           |           |                                                                                     |           |           |           | H19A                                                                                | -1.219963 | -6.335742 | 0.595082  |
|                                                                                   |           |           |           |                                                                                   |           |           |           |                                                                                     |           |           |           | H19B                                                                                | -2.548318 | -5.478295 | -0.235504 |
|                                                                                   |           |           |           |                                                                                   |           |           |           |                                                                                     |           |           |           | H20A                                                                                | 0.368423  | -4.744591 | -0.078016 |
|                                                                                   |           |           |           |                                                                                   |           |           |           |                                                                                     |           |           |           | H20B                                                                                | -0.685024 | -4.926001 | -1.502796 |
|                                                                                   |           |           |           |                                                                                   |           |           |           |                                                                                     |           |           |           | H21                                                                                 | -3.006769 | -2.398808 | -0.522320 |
|                                                                                   |           |           |           |                                                                                   |           |           |           |                                                                                     |           |           |           | H22A                                                                                | -2.324785 | -2.980004 | -2.088454 |
|                                                                                   |           |           |           |                                                                                   |           |           |           |                                                                                     |           |           |           | H22B                                                                                | -2.674753 | -1.207815 | 0.368339  |
|                                                                                   |           |           |           |                                                                                   |           |           |           |                                                                                     |           |           |           | H23                                                                                 | -3.448720 | -0.017174 | -1.221128 |
|                                                                                   |           |           |           |                                                                                   |           |           |           |                                                                                     |           |           |           | H24                                                                                 | -1.565399 | -0.254921 | -2.242763 |
|                                                                                   |           |           |           |                                                                                   |           |           |           |                                                                                     |           |           |           | H25                                                                                 | 0.813714  | -6.525887 | 0.968168  |
|                                                                                   |           |           |           |                                                                                   |           |           |           |                                                                                     |           |           |           | H27                                                                                 | 2.072956  | 1.058895  | 0.482505  |
|                                                                                   |           |           |           |                                                                                   |           |           |           |                                                                                     |           |           |           | H28A                                                                                | 2.652552  | -0.692505 | 2.169305  |
|                                                                                   |           |           |           |                                                                                   |           |           |           |                                                                                     |           |           |           | H28B                                                                                | 3.442090  | -1.518989 | 0.785526  |
|                                                                                   |           |           |           |                                                                                   |           |           |           |                                                                                     |           |           |           | H29A                                                                                | 4.056084  | 1.311923  | 1.712111  |
|                                                                                   |           |           |           |                                                                                   |           |           |           |                                                                                     |           |           |           | H29B                                                                                | 5.010167  | -0.174308 | 0.063732  |
|                                                                                   |           |           |           |                                                                                   |           |           |           |                                                                                     |           |           |           | H30A                                                                                | 4.617540  | 1.259888  | -0.592800 |
|                                                                                   |           |           |           |                                                                                   |           |           |           |                                                                                     |           |           |           | H30B                                                                                | 6.109852  | 1.077135  | 0.360624  |
|                                                                                   |           |           |           |                                                                                   |           |           |           |                                                                                     |           |           |           | H31A                                                                                | 6.162899  | -1.253077 | -0.106400 |
|                                                                                   |           |           |           |                                                                                   |           |           |           |                                                                                     |           |           |           | H31B                                                                                | 6.274387  | -0.243471 | -1.560033 |
|                                                                                   |           |           |           |                                                                                   |           |           |           |                                                                                     |           |           |           | H32                                                                                 | 4.978006  | -2.381224 | -1.       |
